# Supplementary material for: Synthetic integrin antibodies discovered by yeast display reveal αV subunit pairing preferences with β subunits
Source: PubMed Central journal article supplement — bioRxiv. 2024 Jan 27:2024.01.26.577394. Preprint. [Version 1] doi: 10.1101/2024.01.26.577394 (PMC10849667; doi:10.1101/2024.01.26.577394), 2024-01-27
Supplement: NIHPP2024.01.26.577394V1-supplement-1.pdf [file NIHPP2024.01.26.577394V1-supplement-1.pdf]

# Supplementary figure 1

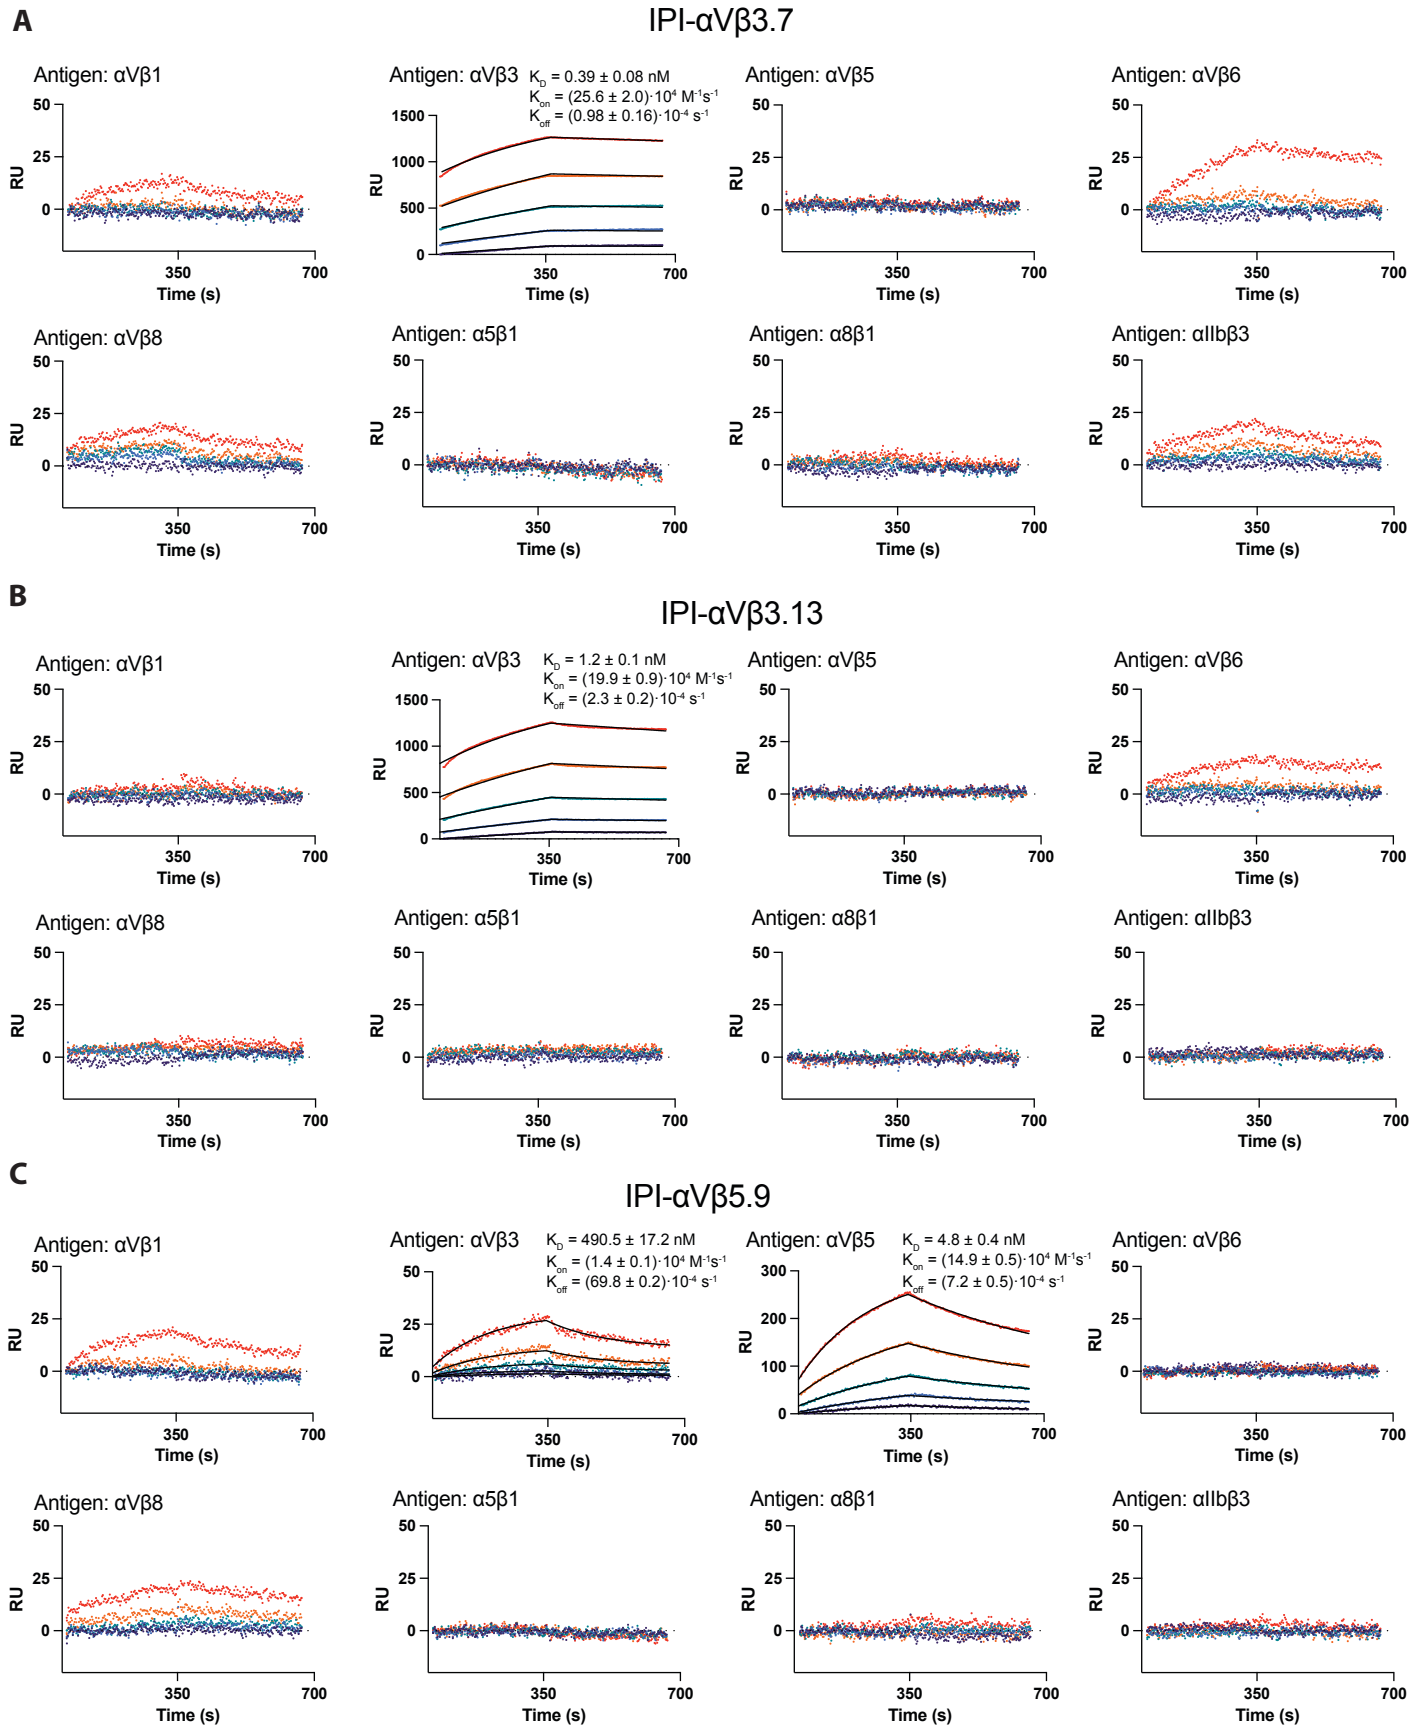

## Supplementary figure 2

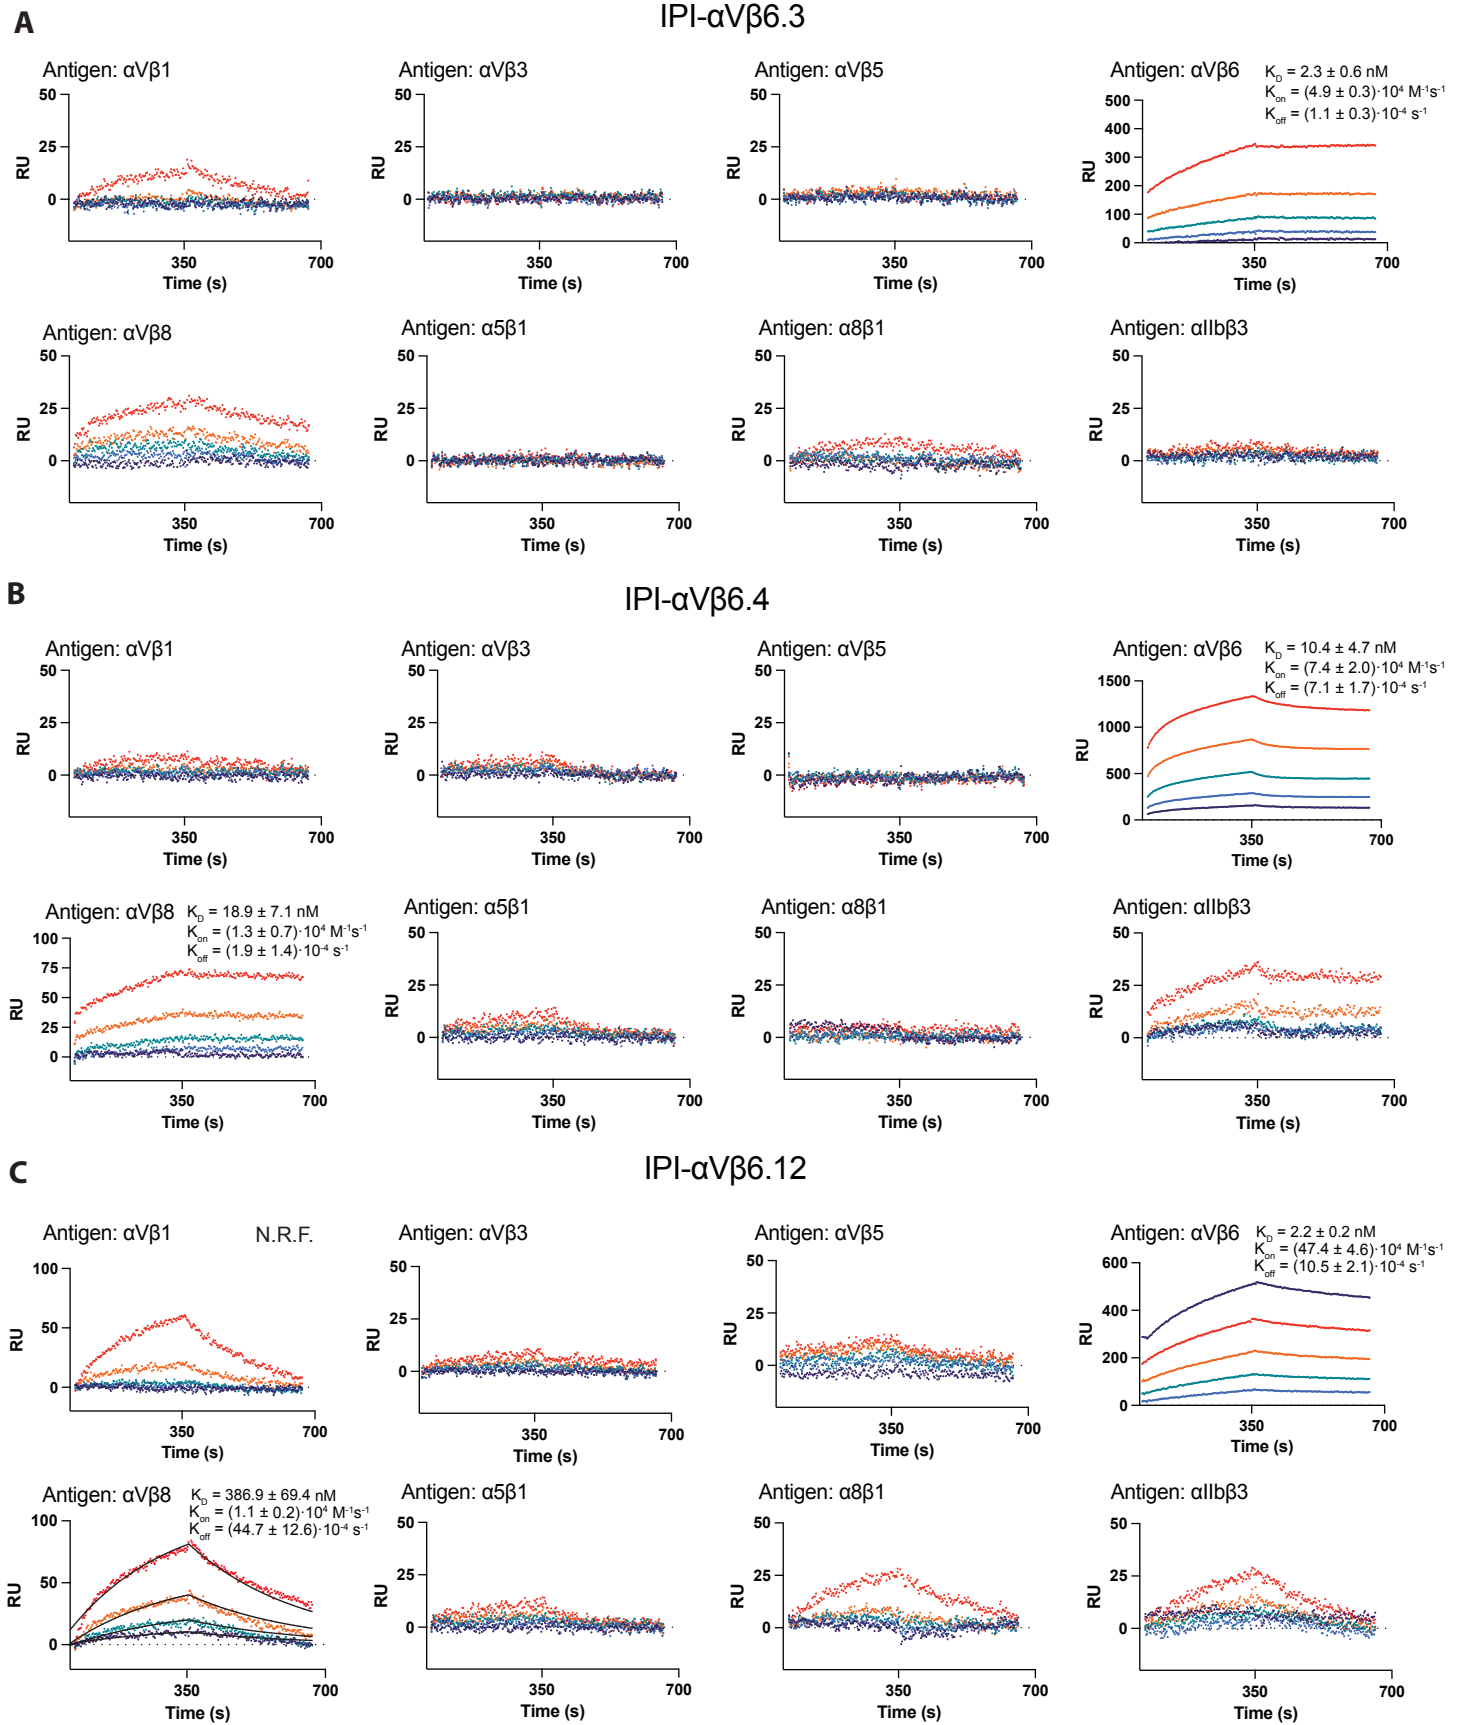

## Supplementary figure 3

A

### IPI- $\alpha$ V $\beta$ 6.2

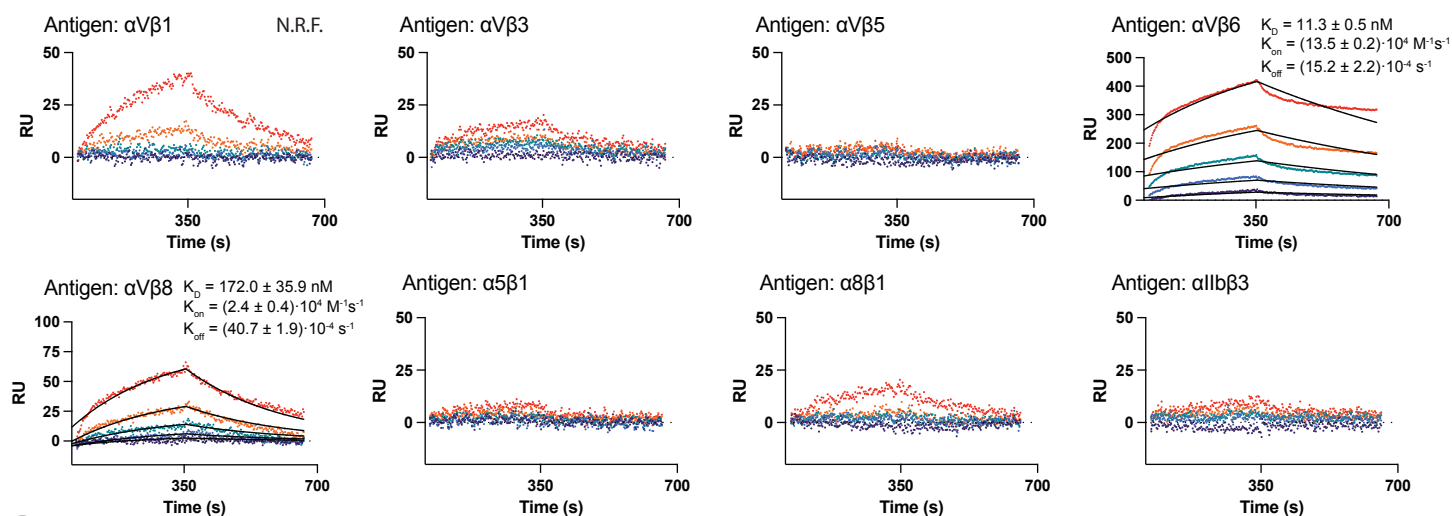

B

### IPI- $\alpha$ V $\beta$ 8.1

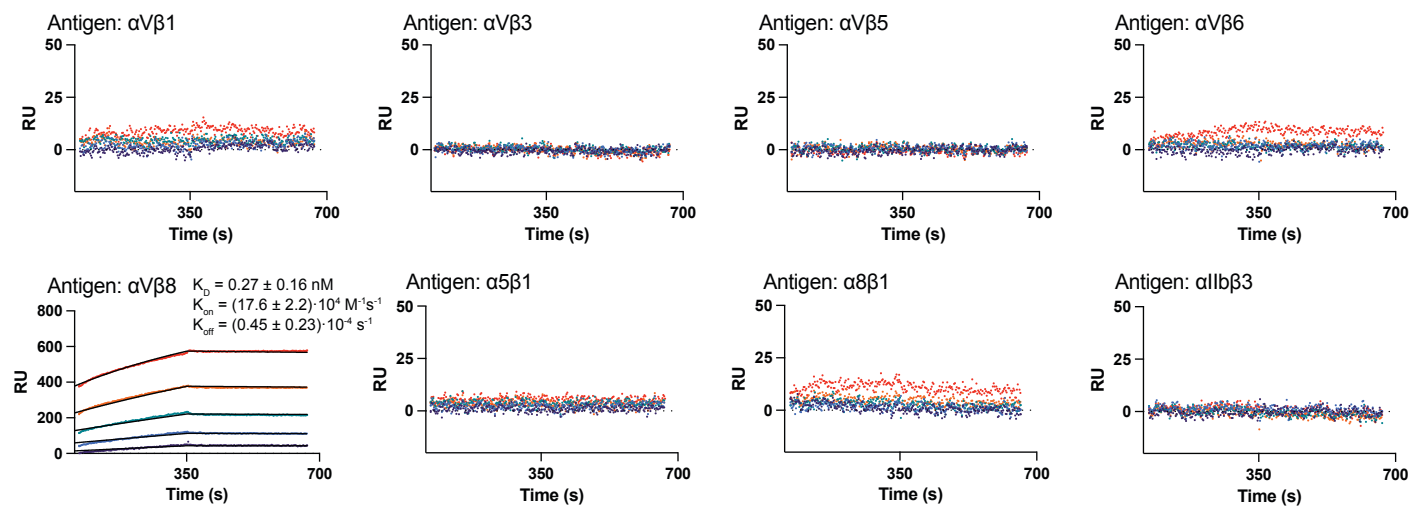

C

### IPI- $\alpha$ V $\beta$ 8.8

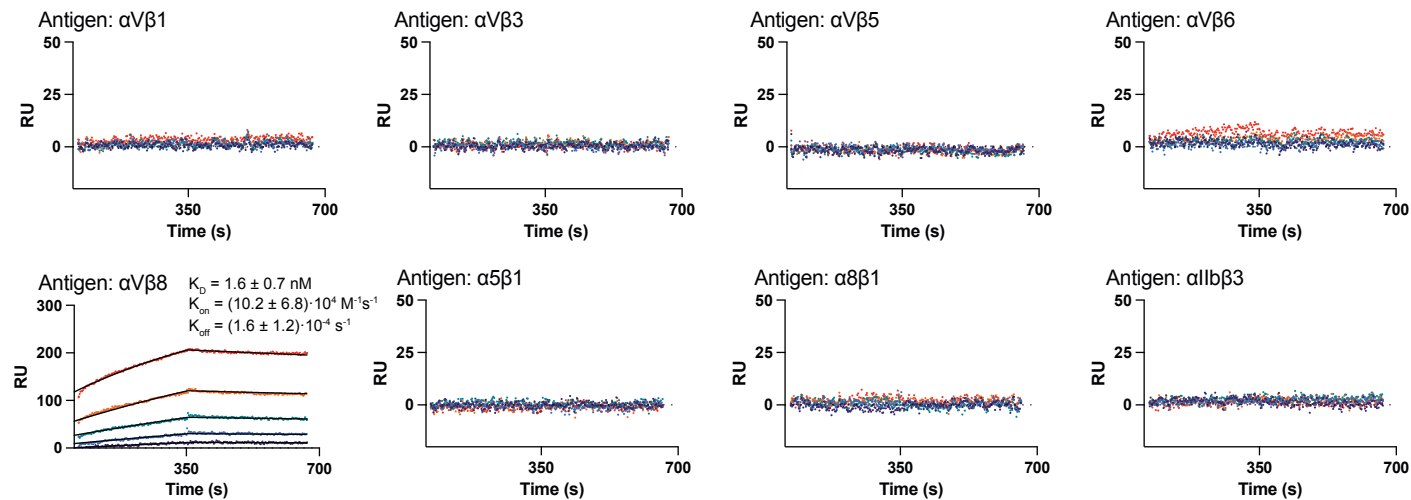

# Supplementary figure 4

## IPI- $\alpha 5\beta 1.2$

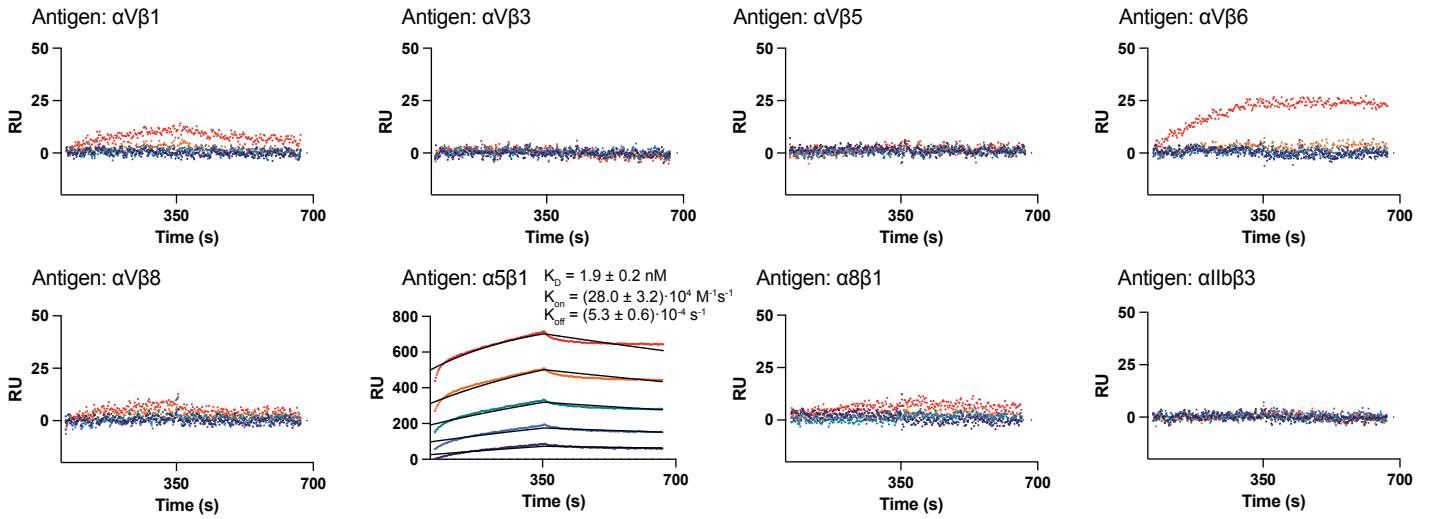

## IPI- $\alpha 5\beta 1.4$

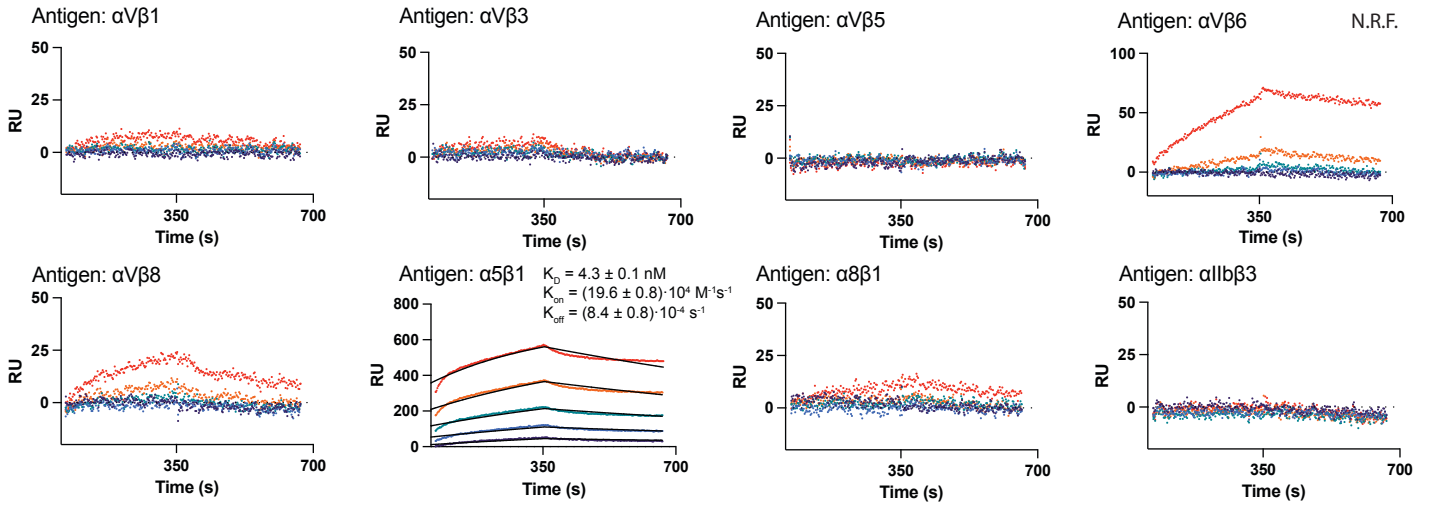

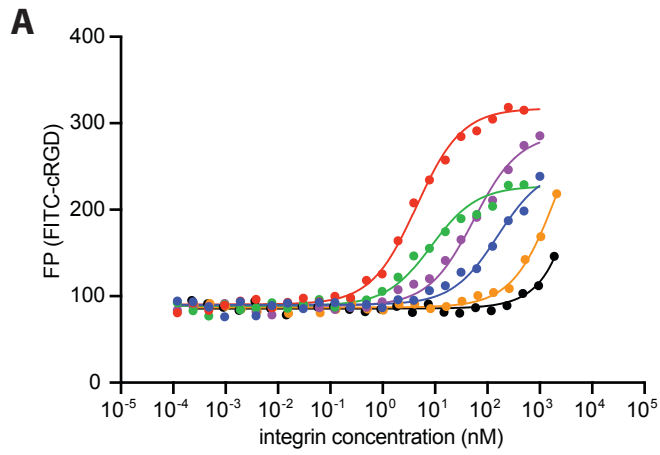

- $\alpha V\beta 1$  (EC50 =  $157 \pm 29$  nM)
- $\alpha V\beta 3$  (EC50 =  $4.4 \pm 0.4$  nM, Kd =  $4.6 \pm 0.4$  nM)
- $\alpha V\beta 5$  (EC50 =  $8.5 \pm 1.5$  nM, Kd =  $5.2 \pm 1.9$  nM)
- $\alpha 5\beta 1$  (EC50 =  $55 \pm 6$  nM, Kd =  $49 \pm 7$  nM)
- $\alpha 8\beta 1$  (EC50 =  $2311 \pm 36$  nM)
- $\alpha IIb\beta 3$  (EC50 not well fit)

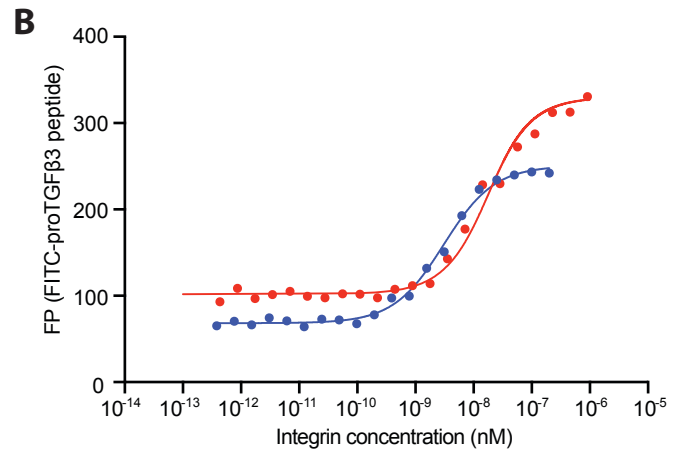

- $\alpha V\beta 6$  (EC50 =  $3.1 \pm 0.3$  nM)
- $\alpha V\beta 8$  (EC50 =  $14.7 \pm 1.5$  nM, Kd =  $12.5 \pm 2.2$  nM)

## Supplementary figure 6

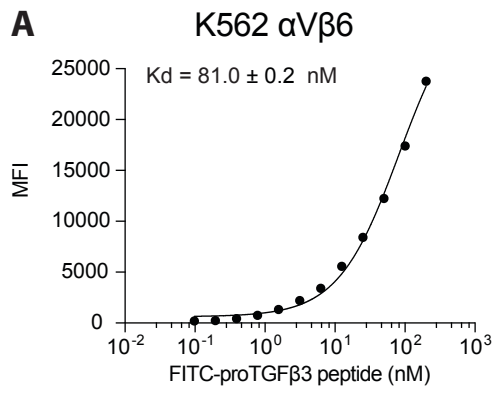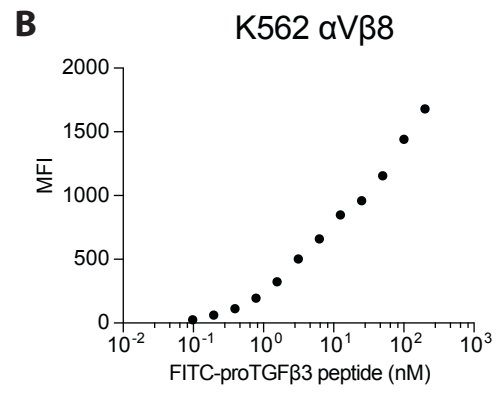

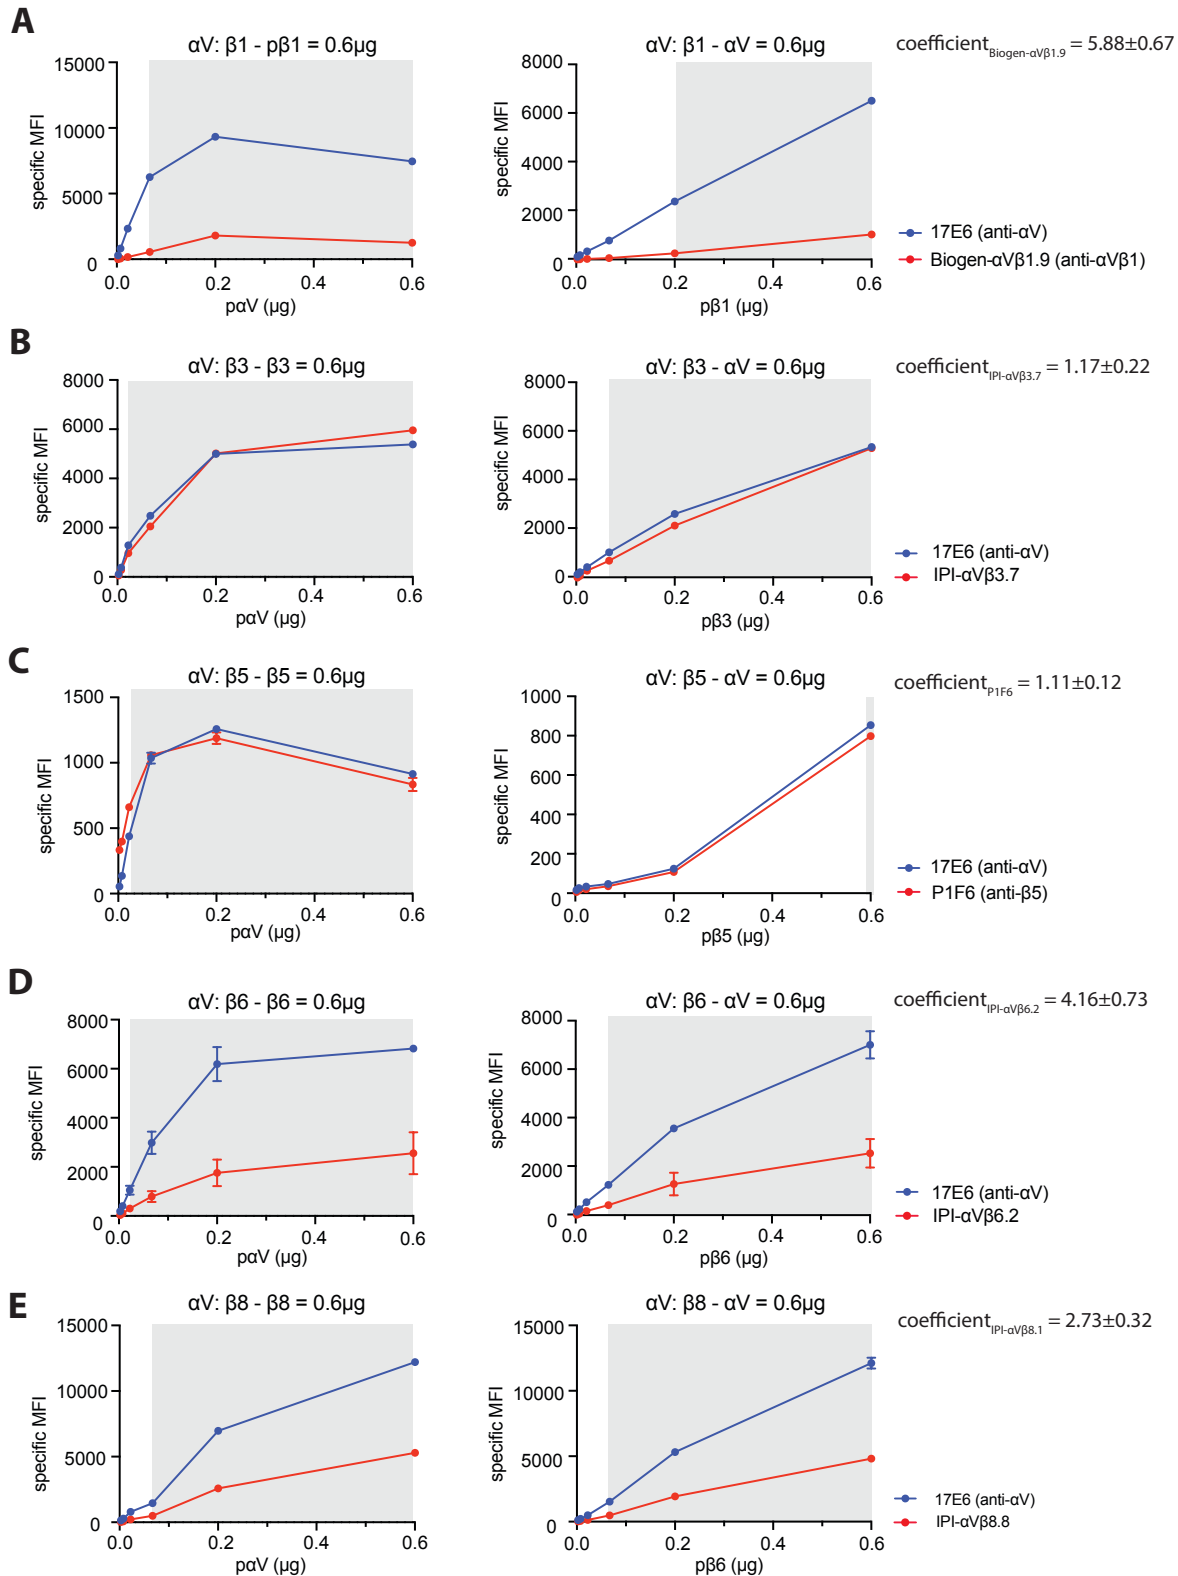

## Supplementary figure 8

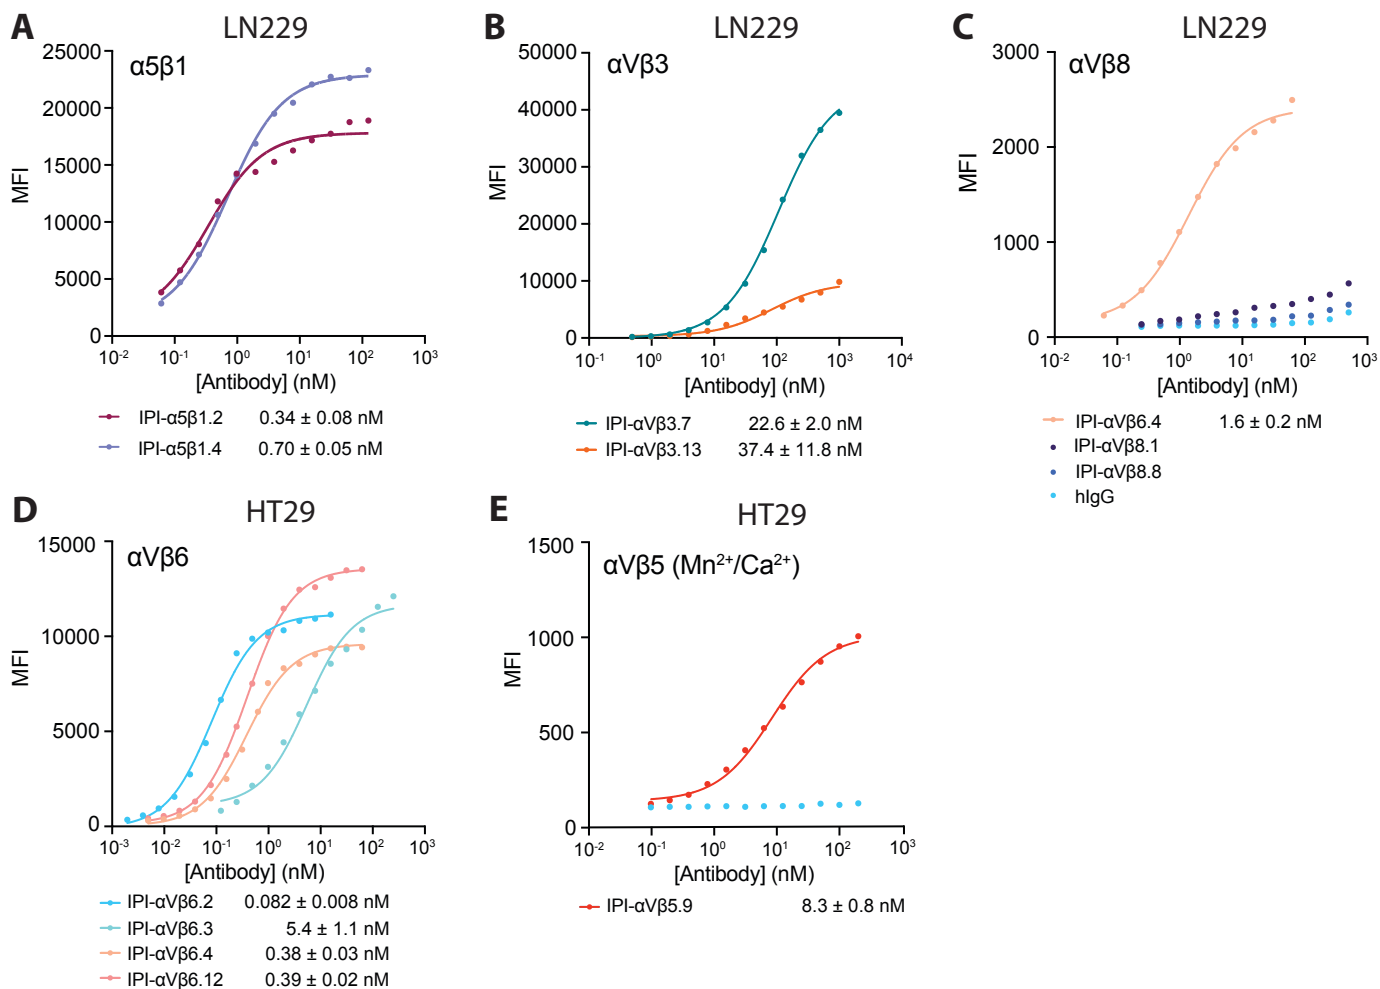



| <b>Supplemental Table 1. <math>K_D</math> and kinetic rates of IPI integrin antibodies.</b> |                           |                                         |                                   |                  |
|---------------------------------------------------------------------------------------------|---------------------------|-----------------------------------------|-----------------------------------|------------------|
|                                                                                             |                           | $k_{on}$ ( $10^4$ M $^{-1}$ s $^{-1}$ ) | $k_{off}$ ( $10^{-4}$ s $^{-1}$ ) | $K_d$ (nM)       |
| $\alpha V\beta 1$<br>ectodomain                                                             | IPI- $\alpha V\beta 3.7$  | -                                       | -                                 | -                |
|                                                                                             | IPI- $\alpha V\beta 3.13$ | -                                       | -                                 | -                |
|                                                                                             | IPI- $\alpha V\beta 5.9$  | -                                       | -                                 | -                |
|                                                                                             | IPI- $\alpha V\beta 6.2$  | N.R.F.                                  | N.R.F.                            | N.R.F.           |
|                                                                                             | IPI- $\alpha V\beta 6.3$  | -                                       | -                                 | -                |
|                                                                                             | IPI- $\alpha V\beta 6.4$  | -                                       | -                                 | -                |
|                                                                                             | IPI- $\alpha V\beta 6.12$ | N.R.F.                                  | N.R.F.                            | N.R.F.           |
|                                                                                             | IPI- $\alpha V\beta 8.1$  | -                                       | -                                 | -                |
|                                                                                             | IPI- $\alpha V\beta 8.8$  | -                                       | -                                 | -                |
|                                                                                             | IPI- $\alpha 5\beta 1.2$  | -                                       | -                                 | -                |
| IPI- $\alpha 5\beta 1.4$                                                                    | -                         | -                                       | -                                 |                  |
| $\alpha V\beta 3$<br>ectodomain                                                             | IPI- $\alpha V\beta 3.7$  | 25.6 $\pm$ 2.0                          | 0.98 $\pm$ 0.16                   | 0.39 $\pm$ 0.08  |
|                                                                                             | IPI- $\alpha V\beta 3.13$ | 19.9 $\pm$ 0.9                          | 2.3 $\pm$ 0.2                     | 1.2 $\pm$ 0.1    |
|                                                                                             | IPI- $\alpha V\beta 5.9$  | 1.4 $\pm$ 0.1                           | 69.8 $\pm$ 2.1                    | 490.5 $\pm$ 17.2 |
|                                                                                             | IPI- $\alpha V\beta 6.2$  | -                                       | -                                 | -                |
|                                                                                             | IPI- $\alpha V\beta 6.3$  | -                                       | -                                 | -                |
|                                                                                             | IPI- $\alpha V\beta 6.4$  | -                                       | -                                 | -                |
|                                                                                             | IPI- $\alpha V\beta 6.12$ | -                                       | -                                 | -                |
|                                                                                             | IPI- $\alpha V\beta 8.1$  | -                                       | -                                 | -                |
|                                                                                             | IPI- $\alpha V\beta 8.8$  | -                                       | -                                 | -                |
|                                                                                             | IPI- $\alpha 5\beta 1.2$  | -                                       | -                                 | -                |
| IPI- $\alpha 5\beta 1.4$                                                                    | -                         | -                                       | -                                 |                  |
| $\alpha V\beta 5$<br>ectodomain                                                             | IPI- $\alpha V\beta 3.7$  | -                                       | -                                 | -                |
|                                                                                             | IPI- $\alpha V\beta 3.13$ | -                                       | -                                 | -                |
|                                                                                             | IPI- $\alpha V\beta 5.9$  | 14.9 $\pm$ 0.5                          | 7.2 $\pm$ 0.5                     | 4.8 $\pm$ 0.4    |
|                                                                                             | IPI- $\alpha V\beta 6.2$  | -                                       | -                                 | -                |
|                                                                                             | IPI- $\alpha V\beta 6.3$  | -                                       | -                                 | -                |
|                                                                                             | IPI- $\alpha V\beta 6.4$  | -                                       | -                                 | -                |
|                                                                                             | IPI- $\alpha V\beta 6.12$ | -                                       | -                                 | -                |
|                                                                                             | IPI- $\alpha V\beta 8.1$  | -                                       | -                                 | -                |
|                                                                                             | IPI- $\alpha V\beta 8.8$  | -                                       | -                                 | -                |
|                                                                                             | IPI- $\alpha 5\beta 1.2$  | -                                       | -                                 | -                |
| IPI- $\alpha 5\beta 1.4$                                                                    | -                         | -                                       | -                                 |                  |
| $\alpha V\beta 6$<br>ectodomain                                                             | IPI- $\alpha V\beta 3.7$  | -                                       | -                                 | -                |
|                                                                                             | IPI- $\alpha V\beta 3.13$ | -                                       | -                                 | -                |
|                                                                                             | IPI- $\alpha V\beta 5.9$  | -                                       | -                                 | -                |
|                                                                                             | IPI- $\alpha V\beta 6.2$  | 13.5 $\pm$ 0.2                          | 15.2 $\pm$ 2.2                    | 11.3 $\pm$ 0.5   |
|                                                                                             | IPI- $\alpha V\beta 6.3$  | 4.9 $\pm$ 0.3                           | 1.1 $\pm$ 0.3                     | 2.3 $\pm$ 0.6    |
|                                                                                             | IPI- $\alpha V\beta 6.4$  | 7.4 $\pm$ 2.0                           | 7.1 $\pm$ 1.7                     | 10.4 $\pm$ 4.7   |
|                                                                                             | IPI- $\alpha V\beta 6.12$ | 47.4 $\pm$ 4.6                          | 10.4 $\pm$ 1.8                    | 2.2 $\pm$ 0.2    |
|                                                                                             | IPI- $\alpha V\beta 8.1$  | -                                       | -                                 | -                |
|                                                                                             | IPI- $\alpha V\beta 8.8$  | -                                       | -                                 | -                |
|                                                                                             | IPI- $\alpha 5\beta 1.2$  | -                                       | -                                 | -                |
| IPI- $\alpha 5\beta 1.4$                                                                    | N.R.F.                    | N.R.F.                                  | N.R.F.                            |                  |

| <b>Supplemental Table 1, cont. K<sub>D</sub> and kinetic rates of IPI integrin antibodies</b> |             |                                                                    |                                                      |                     |
|-----------------------------------------------------------------------------------------------|-------------|--------------------------------------------------------------------|------------------------------------------------------|---------------------|
|                                                                                               |             | k <sub>on</sub> (10 <sup>4</sup> M <sup>-1</sup> s <sup>-1</sup> ) | k <sub>off</sub> (10 <sup>-4</sup> s <sup>-1</sup> ) | K <sub>d</sub> (nM) |
| αVβ8<br>ectodomain                                                                            | IPI-αVβ3.7  | -                                                                  | -                                                    | -                   |
|                                                                                               | IPI-αVβ3.13 | -                                                                  | -                                                    | -                   |
|                                                                                               | IPI-αVβ5.9  | -                                                                  | -                                                    | -                   |
|                                                                                               | IPI-αVβ6.2  | 2.4 ± 0.4                                                          | 40.7 ± 1.9                                           | 172.0 ± 35.9        |
|                                                                                               | IPI-αVβ6.3  | -                                                                  | -                                                    | -                   |
|                                                                                               | IPI-αVβ6.4  | 1.3 ± 0.7                                                          | 1.9 ± 1.4                                            | 18.9 ± 7.1          |
|                                                                                               | IPI-αVβ6.12 | 1.1 ± 0.2                                                          | 44.7 ± 12.6                                          | 386.9 ± 34.6        |
|                                                                                               | IPI-αVβ8.1  | 17.6 ± 2.2                                                         | 0.45 ± 0.23                                          | 0.27 ± 0.16         |
|                                                                                               | IPI-αVβ8.8  | 10.2 ± 6.8                                                         | 1.6 ± 1.2                                            | 1.6 ± 0.7           |
|                                                                                               | IPI-α5β1.2  | -                                                                  | -                                                    | -                   |
| IPI-α5β1.4                                                                                    | -           | -                                                                  | -                                                    |                     |
| α5β1<br>ectodomain                                                                            | IPI-αVβ3.7  | -                                                                  | -                                                    | -                   |
|                                                                                               | IPI-αVβ3.13 | -                                                                  | -                                                    | -                   |
|                                                                                               | IPI-αVβ5.9  | -                                                                  | -                                                    | -                   |
|                                                                                               | IPI-αVβ6.2  | -                                                                  | -                                                    | -                   |
|                                                                                               | IPI-αVβ6.3  | -                                                                  | -                                                    | -                   |
|                                                                                               | IPI-αVβ6.4  | -                                                                  | -                                                    | -                   |
|                                                                                               | IPI-αVβ6.12 | -                                                                  | -                                                    | -                   |
|                                                                                               | IPI-αVβ8.1  | -                                                                  | -                                                    | -                   |
|                                                                                               | IPI-αVβ8.8  | -                                                                  | -                                                    | -                   |
|                                                                                               | IPI-α5β1.2  | 28.0 ± 3.2                                                         | 5.3 ± 0.6                                            | 1.9 ± 0.2           |
| IPI-α5β1.4                                                                                    | 19.6 ± 0.8  | 8.4 ± 0.8                                                          | 4.3 ± 0.1                                            |                     |
| α8β1<br>ectodomain                                                                            | IPI-αVβ3.7  | -                                                                  | -                                                    | -                   |
|                                                                                               | IPI-αVβ3.13 | -                                                                  | -                                                    | -                   |
|                                                                                               | IPI-αVβ5.9  | -                                                                  | -                                                    | -                   |
|                                                                                               | IPI-αVβ6.2  | -                                                                  | -                                                    | -                   |
|                                                                                               | IPI-αVβ6.3  | -                                                                  | -                                                    | -                   |
|                                                                                               | IPI-αVβ6.4  | -                                                                  | -                                                    | -                   |
|                                                                                               | IPI-αVβ6.12 | -                                                                  | -                                                    | -                   |
|                                                                                               | IPI-αVβ8.1  | -                                                                  | -                                                    | -                   |
|                                                                                               | IPI-αVβ8.8  | -                                                                  | -                                                    | -                   |
|                                                                                               | IPI-α5β1.2  | -                                                                  | -                                                    | -                   |
| IPI-α5β1.4                                                                                    | -           | -                                                                  | -                                                    |                     |
| αIIbβ3<br>ectodomain                                                                          | IPI-αVβ3.7  | -                                                                  | -                                                    | -                   |
|                                                                                               | IPI-αVβ3.13 | -                                                                  | -                                                    | -                   |
|                                                                                               | IPI-αVβ5.9  | -                                                                  | -                                                    | -                   |
|                                                                                               | IPI-αVβ6.2  | -                                                                  | -                                                    | -                   |
|                                                                                               | IPI-αVβ6.3  | -                                                                  | -                                                    | -                   |
|                                                                                               | IPI-αVβ6.4  | -                                                                  | -                                                    | -                   |
|                                                                                               | IPI-αVβ6.12 | -                                                                  | -                                                    | -                   |
|                                                                                               | IPI-αVβ8.1  | -                                                                  | -                                                    | -                   |
|                                                                                               | IPI-αVβ8.8  | -                                                                  | -                                                    | -                   |
|                                                                                               | IPI-α5β1.2  | -                                                                  | -                                                    | -                   |
| IPI-α5β1.4                                                                                    | -           | -                                                                  | -                                                    |                     |

Gray cells represent antibody that bind to the targeting antigen.

-: non-significant binding; R<sub>0</sub> (Response units at the end of association phase) was less than 10% of the R<sub>0</sub> of specific antibodies on the same target antigen.

N.R.F.: No reliable fit. The R<sub>0</sub> was between 10% and 20% of the R<sub>0</sub> of specific antibodies on the same target antigen, but a fit with 3 or more concentrations of the antibody with an R square > 0.9 could not be obtained (Supplementary Figures 1-4).
